# The Metabolic Syndrome Defined by Factor Analysis and Incident Type 2 Diabetes in a Chinese Population With High Postprandial Glucose

JIAN-JUN WANG, MD<sup>1</sup>  
QING QIAO, MD, PHD<sup>1,2</sup>  
MAIJA E. MIETTINEN, BSC<sup>1</sup>

JANI LAPPALAINEN, BSC<sup>1</sup>  
GANG HU, MD, PHD<sup>1,2</sup>  
JAAKKO TUOMILEHTO, MD, PHD<sup>1,2</sup>

**OBJECTIVE** — The aim of this study was to examine how the major components of the metabolic syndrome relate to each other and to the development of diabetes using factor analysis.

**RESEARCH DESIGN AND METHODS** — The screening survey for type 2 diabetes was conducted in 1994, and a follow-up study of nondiabetic individuals at baseline was carried out in 1999 in the Beijing area. Among 934 nondiabetic and 305 diabetic subjects at baseline, factor analysis was performed using the principle components analysis with varimax orthogonal rotation of continuously distributed variables considered to represent the components of the metabolic syndrome. Fasting insulin was used as a marker for insulin resistance. Of the 559 subjects without diabetes at baseline, 129 developed diabetes during the 5-year follow-up. Factors identified at baseline were used as independent variables in univariate and multivariate logistic regression models to determine risk factor clusters predicting the development of diabetes.

**RESULTS** — Four factors were identified in nondiabetic and diabetic subjects. Fasting insulin levels, BMI, and waist-to-hip ratio were associated with one factor. Systolic and diastolic blood pressures were associated with the second factor. Two-hour postload plasma glucose (2-h PG) and serum insulin and fasting plasma glucose were associated with the third factor. Serum total cholesterol and triglycerides were associated with the fourth factor. The first and the third factors predicted the development of diabetes. In diabetic patients at baseline, the combination of systolic and diastolic blood pressure was the most important factor, and urinary albumin excretion rate clustered with fasting and 2-h PG levels.

**CONCLUSIONS** — Insulin resistance alone does not underlie all features of the metabolic syndrome. Different physiological processes associated with various components of the metabolic syndrome contain unique information about diabetes risk. Microalbuminuria is more likely to be a complication of type 2 diabetes or hypertension than a marker for the metabolic syndrome.

*Diabetes Care* 27:2429–2437, 2004

From the <sup>1</sup>Diabetes and Genetic Epidemiology Unit, Department of Epidemiology and Health Promotion, National Public Health Institute, Helsinki, Finland; and the <sup>2</sup>Department of Public Health, University of Helsinki, Finland.

Address correspondence and reprint requests to Dr. Jianjun Wang, Diabetes and Genetic Epidemiology Unit, Department of Epidemiology and Health Promotion, National Public Health Institute, KTL/GE-Lab, Kytösuoentie 11, FIN-00300 Helsinki, Finland. E-mail: jianjun.wang@ktl.fi.

Received for publication 4 February 2004 and accepted in revised form 29 June 2004.

**Abbreviations:** 2-h PG, 2-h postload glucose; DBP, diastolic blood pressure; FPG, fasting plasma glucose; IGR, impaired glucose regulation; IGT, impaired glucose tolerance; NGT, normal glucose tolerance; OGTT, oral glucose tolerance test; SBP, systolic blood pressure; UAER, urinary albumin excretion rate; WHR, waist-to-hip ratio.

A table elsewhere in this issue shows conventional and Système International (SI) units and conversion factors for many substances.

© 2004 by the American Diabetes Association.

The clustering of hypertension, dyslipidemia, glucose intolerance, insulin resistance, hyperinsulinemia, microalbuminuria, and obesity, particularly central obesity, has been termed the metabolic syndrome (1). Controversies still exist as to whether microalbuminuria is a component of the syndrome (2–4). An important feature of the syndrome is insulin resistance, which is characterized by increased serum fasting insulin levels among nondiabetic individuals in epidemiological studies (5,6). Thus, it has been called syndrome X or insulin resistance syndrome (7,8). Despite that the underlying mechanism of the syndrome is not completely understood, obesity and sedentary lifestyle coupled with unbalanced diet and still largely unknown genetic factors interact to produce the syndrome (9,10). It has been proposed that this syndrome is a powerful determinant of type 2 diabetes and cardiovascular disease (7,8,11). Recently, factor analysis, a statistical technique for studies including interrelating variables, has been applied to investigate the risk factor clustering in the metabolic syndrome (12–18) and to predict coronary heart disease or total and cardiovascular disease mortality (19,20). However, little information is currently available on the mechanism with which the major components of the metabolic syndrome, including urinary albumin excretion rate (UAER), relate to each other in nondiabetic and diabetic individuals. Furthermore, there are only few prospective studies evaluating the extent to which the metabolic syndrome or its individual components predict the development of type 2 diabetes (21,22). Therefore, we applied factor analysis to investigate how the major components of the metabolic syndrome relate to each other and to the development of diabetes in a Chinese population. We have also compared our findings in women and men and in nondiabetic and diabetic participants separately.

## RESEARCH DESIGN AND METHODS

The First National Diabetes Survey was carried out in China in 1980 (23). The second National Diabetes Survey (24), comprising a population of ~250,000 in 19 provinces and areas, was launched in 1994. In April 1994, a workshop was held to standardize the protocol and methodology, and a 3-day training course took place for the investigators in each location before the baseline survey. The results from the previous Da Qing Impaired Glucose Tolerance and Diabetes study on 2,692 subjects with 2-h postprandial plasma glucose values of 6.67–7.7 mmol/l showed 9 (0.3%) cases of diabetes and 31 (1.2%) cases of impaired glucose tolerance (IGT) based on 1985 World Health Organization criteria (25). Thus, the subjects with 2-h postprandial capillary glucose <6.67 mmol/l would be expected to have an extremely low percentage of diabetes or IGT. In this context, a fingerstick prescreening using the One Touch II glucose meter after breakfast containing at least 80 g of carbohydrate was used in our screening survey to maximize the yield of abnormal glucose tolerance at a 75-g oral glucose tolerance test (OGTT). In the participants whose 2-h postprandial capillary blood glucose was  $\geq 6.67$  mmol/l, the OGTT was performed. The Beijing Project, as part of the National Diabetes Survey, was carried out between July 1994 and January 1995 (26). The participants and design of the Beijing Project have been described previously in more details (24,26,27). Briefly, 76 units in the Beijing area, including 33 villages, 15 factories, 11 military camps, and 17 urban communities, were randomly ascertained with a multistage sampling method. In these units, 20,682 inhabitants aged 25–82 years (64% were aged 25–44 years) participated in the finger blood glucose screening survey. The participation rate was 92%. A total of 2,499 participants aged 25–80 years, who at the screening had a 2-h capillary blood glucose  $\geq 6.67$  mmol/l, were invited to participate in the OGTT. Among them, the OGTT was performed in 1,566 (62.7%) subjects. Of these 1,566 subjects, after excluding 106 with known diabetes and 221 currently taking antihypertensive or hypolipidemic drugs, 305 with newly diagnosed diabetes and 934 without diabetes were included in this study (Fig. 1).

From October 1999 to January 2000,

the 5-year follow-up survey was carried out in subjects who participated in the OGTT at baseline. Of the initial 1,566 subjects, 483 had moved out of Beijing and 181 individuals could not be followed up because of logistic reasons. The remaining 902 (57.6%) individuals participated in the follow-up examination. The nonparticipants did not differ significantly from participants in age, sex, BMI, waist-to-hip ratio (WHR), plasma fasting and 2-h postload glucose (2-h PG), serum fasting and 2-h postload insulin, triglycerides, total cholesterol, timed 2-h UAER, and the frequency of diabetes, hypertension, and obesity at baseline. Of the 902 subjects who participated in the follow-up study, 275 with diabetes at baseline and 68 currently taking antihypertensive or hypolipidemic drugs were excluded in this study. Thus, 559 subjects without diabetes at baseline and who were not receiving antihypertensive or hypolipidemic treatment were included in the study (Fig. 1). Of them, 129 had developed type 2 diabetes (61 men and 68 women) during the 5-year follow-up. The enrollment and examination of subjects were conducted in accordance with the Helsinki Declaration. All subjects with diabetes were diagnosed according to the 1999 World Health Organization criteria for diabetes (1).

### Anthropometric measurements

The anthropometric measurements and laboratory methods were similar at both the baseline and the follow-up surveys. The physicians completed the interview questionnaire, which included questions about past medical history, family history of diabetes, history of pharmacological treatment, smoking habits, occupation, and education. Family history of diabetes and antihypertensive and hypolipidemic medication were dichotomized. Smoking status included current smoker and non-smoker. Occupation was classified as white- or blue-collar work. Three education categories were created according to the total number of school years: 0–6, 7–12, and  $\geq 13$  years.

Body weight of the subjects wearing light clothing without shoes was measured with a 0.1-kg precision. Height was measured to the nearest 0.5 cm. BMI was calculated as the weight in kilograms divided by the square of the height in meters. Waist girth was defined as the average of two measurements taken after in-

spiration and expiration at the midpoint between the lowest rib and iliac crest. Hip circumference was measured at the point of trochanter major. The WHR was defined as waist girth to hip circumference. Obesity was defined as WHR  $>0.90$  and/or BMI  $>30$  kg/m<sup>2</sup> (for men) or WHR  $>0.85$  and/or BMI  $>30$  kg/m<sup>2</sup> (for women) (1). After each subject had been seated for 5 min, blood pressure was measured twice to the nearest 2 mmHg from the left arm of the participant using a standard sphygmomanometer. The average of the two measurements was used for all analyses. Diastolic blood pressure (DBP) was recorded at the fifth Korotkoff sound. Hypertension was defined as systolic blood pressure (SBP)  $\geq 140$  mmHg and/or DBP  $\geq 90$  mmHg (1).

### Laboratory methods

After a 10- to 12-h overnight fast, each subject voided and then the fasting blood sample was collected. A 75-g anhydrous glucose dissolved in 300 ml of water was given orally over the course of 5 min, and a second blood sample was drawn 2 h later for the glucose and insulin determinations. A urine sample was collected immediately after the 2-h blood collection to quantify timed 2-h UAER. Blood samples were immediately centrifuged and processed further. Plasma glucose was detected in duplicate within 2 h by a glucose oxidase method at the Laboratory Center of Beijing Tongren Hospital. Serum insulin was determined by a double-antibody radioimmunoassay (Huaxi, Sichuan, China). Urinary albumin concentration was measured by radioimmunoassay (MA kit; 401, Beijing, China). Their intra- and interassay coefficients of variation were  $<6$  and  $<8\%$  for insulin and  $<5$  and  $<7\%$  for urinary albumin. Microalbuminuria was defined as UAER  $\geq 20$   $\mu$ g/min (1). Serum total cholesterol level and triglyceride were measured by enzymatic methods using Zhongsheng reagents (Zhongsheng, Beijing, China).

### Diagnosis of diabetes and study groups

According to the 1999 World Health Organization criteria (1), the participants were classified into the categories of glycemic status based on fasting plasma glucose (FPG) and 2-h PG: normal fasting glucose and normal glucose tolerance (NGT) (FPG  $<6.1$  mmol/l and 2-h PG  $<7.8$  mmol/l); impaired glucose regula-

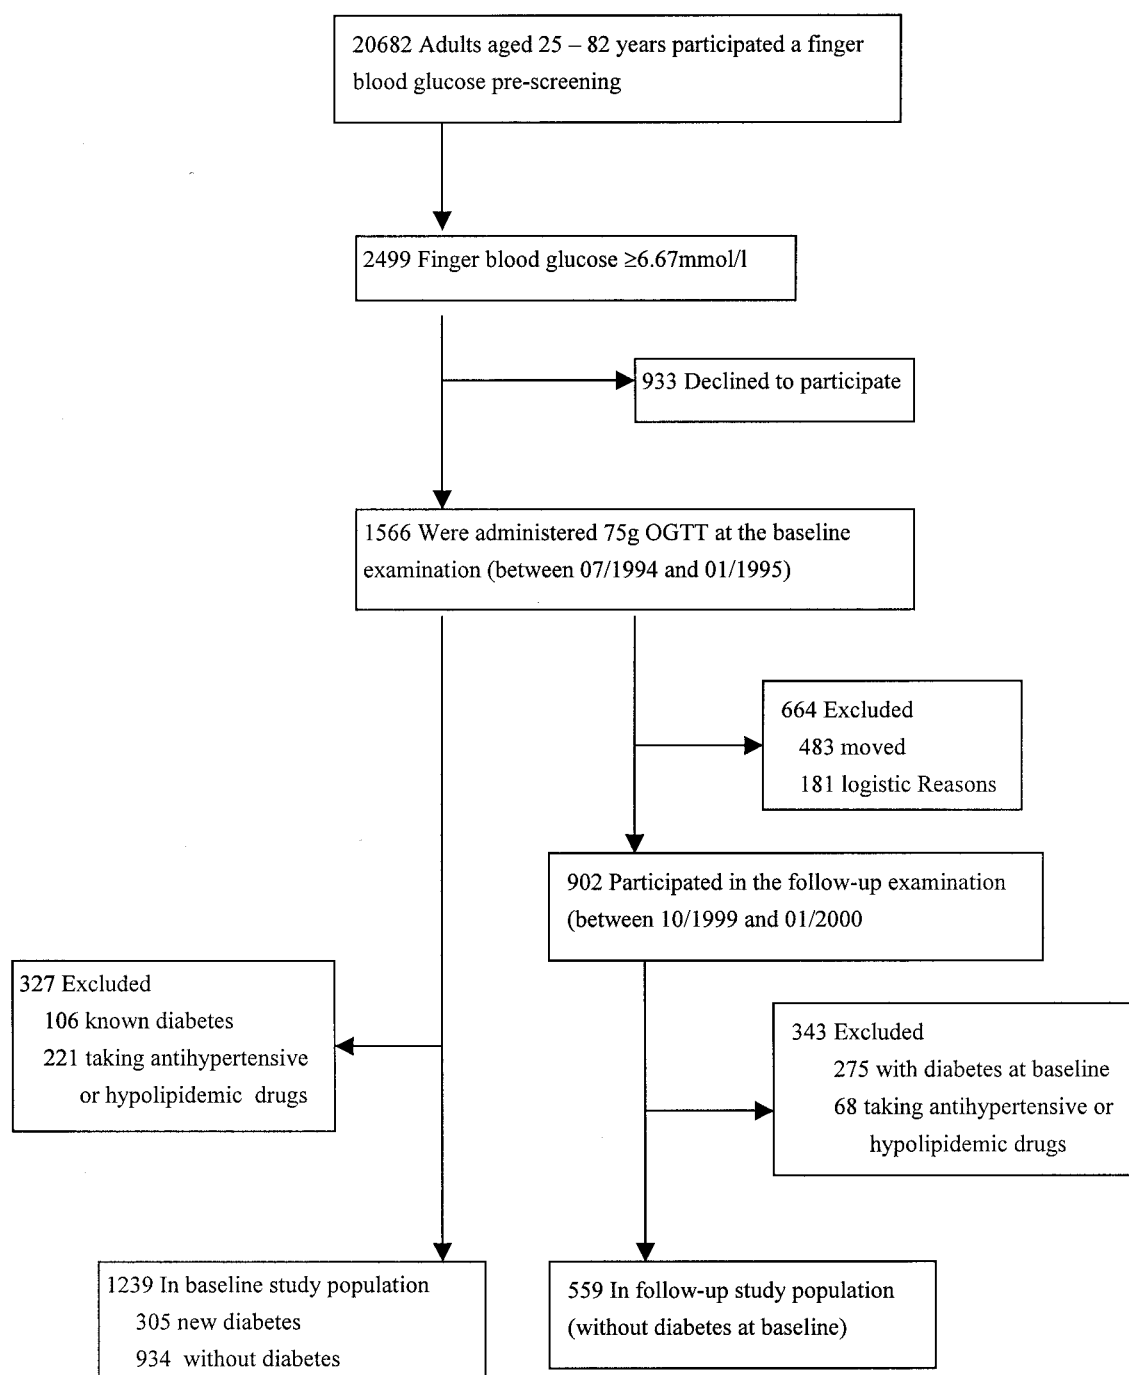

**Figure 1**—Study population at the baseline and at the follow-up examination.

tion (IGR), which consists of impaired fasting glucose and/or IGT (FPG 6.1–7.0 mmol/l and/or 2-h PG 7.8–11.1 mmol/l); and diabetes (FPG  $\geq 7.0$  mmol/l and/or 2-h PG  $\geq 11.1$  mmol/l). At baseline, the two study groups were defined as follows: the nondiabetic group comprised the participants with both normal fasting glucose

and NGT and those with IGR at baseline, and the diabetic group comprised the participants with newly diagnosed diabetes at baseline.

#### Statistical analyses

All statistical analyses were performed separately by sex with SPSS 11.5 software

(SPSS, Chicago, IL). Log-transformed values were used for variables skewed toward the high values such as UAER, serum triglycerides, fasting, and 2-h post-load insulin. Group means were compared by Student's *t* test, and the differences in proportions were compared by  $\chi^2$  test. Individual associations

Table 1—Comparison of characteristics by sex in 934 nondiabetic and 305 diabetic subjects at baseline

|                                     | Nondiabetic   |               |        | Diabetic      |               |        |
|-------------------------------------|---------------|---------------|--------|---------------|---------------|--------|
|                                     | Men           | Women         | P      | Men           | Women         | P      |
| n                                   | 449           | 485           |        | 132           | 173           |        |
| Age (years)                         | 49 ± 12       | 47 ± 11       | 0.007  | 51 ± 10       | 52 ± 11       | <0.001 |
| BMI (kg/m <sup>2</sup> )            | 24.6 ± 3.6    | 24.6 ± 4.0    | NS     | 25.1 ± 3.0    | 26.1 ± 4.7    | 0.011  |
| WHR                                 | 0.91 ± 0.07   | 0.89 ± 0.09   | 0.004  | 0.92 ± 0.1    | 0.90 ± 0.1    | 0.044  |
| SBP (mmHg)                          | 127 ± 23      | 127 ± 23      | NS     | 131 ± 21      | 143 ± 29      | <0.001 |
| DBP (mmHg)                          | 80 ± 13       | 78 ± 12       | 0.007  | 84 ± 20       | 84 ± 12       | NS     |
| UAER (μg/min)*                      | 5.4 (4.8–6.0) | 4.6 (4.1–5.2) | NS     | 7.8 (6.4–9.5) | 7.9 (6.4–9.8) | NS     |
| Cholesterol (mmol/l)                | 5.0 ± 2.2     | 4.9 ± 1.6     | NS     | 5.0 ± 1.7     | 5.5 ± 1.8     | 0.007  |
| Triglycerides (mmol/l)*             | 1.4 (1.3–1.5) | 1.4 (1.3–1.4) | NS     | 1.8 (1.6–2.0) | 1.8 (1.6–1.9) | NS     |
| Fasting insulin (pmol/l)*           | 44 (42–46)    | 48 (45–50)    | 0.02   | 53 (48–58)    | 63 (58–69)    | 0.007  |
| 2-h insulin (pmol/l)*               | 154 (144–164) | 200 (189–213) | <0.001 | 195 (171–223) | 234 (210–261) | 0.035  |
| Fasting glucose (mmol/l)            | 5.7 ± 0.6     | 5.5 ± 0.8     | <0.001 | 8.2 ± 2.1     | 8.6 ± 2.6     | NS     |
| 2-h PG (mmol/l)                     | 6.5 ± 2.0     | 7.1 ± 2.3     | <0.001 | 10.6 ± 4.5    | 12.0 ± 4.9    | 0.009  |
| Smoking (%)                         | 53            | 8             | <0.001 | 52            | 14            | <0.001 |
| Family history of diabetes (%)      | 13            | 19            | NS     | 18            | 13            | NS     |
| IGR (%)                             | 52            | 49            | NS     |               |               |        |
| Hypertension (%)                    | 39            | 42            | NS     | 56            | 60            | NS     |
| Obesity (%)                         | 55            | 61            | NS     | 68            | 78            | 0.02   |
| Serum triglycerides ≥1.7 mmol/l (%) | 43            | 41            | NS     | 56            | 57            | NS     |
| Microalbuminuria (%)†               | 13            | 10            | NS     | 25            | 21            | NS     |

Data are means ± SD or percentage. Impaired glucose regulation, FPG 6.1–6.9 mmol/l and/or 2-h PG 7.8–11.0 mmol/l; hypertension, SBP ≥140 mmHg and/or DBP ≥90 mmHg; obesity, WHR >0.90 and/or BMI >30 kg/m<sup>2</sup> (for men) or WHR >0.85 and/or BMI >30 kg/m<sup>2</sup> (for women); microalbuminuria, UAER ≥20 μg/min.

\*Geometric mean (95% CI); †P < 0.01, diabetic versus nondiabetic men or diabetic versus nondiabetic women.

between variables were assessed using Pearson's correlation coefficients adjusted for age. Factor analyses were conducted to determine risk factor clusters by diabetes status and sex using the baseline survey data. All the continuous variables considered to represent the components of the metabolic syndrome including UAER and fasting insulin were included. If there is a single underlying cause for the clustering of the risk variables, factor analyses should only identify one dominant factor. Factor analysis involves three procedures: 1) extraction of the initial components, 2) rotation of the principal components, and 3) interpretation of the factors identified. Principal component analysis first transformed a set of correlated risk factors to a linear combination of the variables accounting for the maximum proportion of the total variance and thus formed a new set of uncorrelated components. The components with eigenvalues >1.0 were retained in the analysis. Eigenvalues are the sum of squared correlations between the original independent variables and the principal components obtained, and they represent the amount of variance attributable to the components of a factor. Each of the components is rotated to facilitate their inter-

pretation and then referred to as factors. A varimax orthogonal rotation was used in this analysis to obtain the factors. To interpret the results from factor analyses, the pattern of factor loadings was examined to determine which original variables represent primary constituents of each factor. An absolute loading value ≥0.40 was used to interpret the resulting factor pattern (28).

Finally, based on the follow-up data, factors identified were used as independent variables in univariate and multivariate logistic regression models to determine risk factor clusters predicting the development of diabetes adjusting for age, smoking, family history of diabetes, education, and occupation.

**RESULTS**— The characteristics of the nondiabetic and diabetic subjects at baseline by sex are presented in Table 1. In nondiabetic participants, men were older than women, whereas in diabetic participants, men were younger. Over one-half of both nondiabetic and diabetic men were current smokers. As expected, men had higher WHR than women. High BMI and obesity were more common in diabetic women compared with men. Women had higher fasting and 2-h insu-

lin values and 2-h PG compared with men. SBP was higher in diabetic women than men, whereas in nondiabetic participants, mean FPG was lower in women than men. No differences in the prevalence of IGR, hypertension, high serum triglycerides (≥1.7 mmol/l), and microalbuminuria were observed between men and women. The prevalence of hypertension, obesity, high serum triglycerides (≥1.7 mmol/l), and microalbuminuria was higher in both men and women with diabetes than those without.

### Factor analyses in nondiabetic participants

After adjustment for age, BMI and WHR correlated with SBP, DBP, and fasting and 2-h insulin in both men and women. Fasting and 2-h insulin correlated significantly with most other variables, especially in men. Serum cholesterol had low correlations with most other parameters. Both SBP and DBP correlated significantly with UAER in men but not in women (data not shown). The factor patterns were consistent in analyses between men and women (Table 2 and Fig. 2). There were four factors determined with eigenvalues >1, which accounted for 59% of the variance in the original vari-

Table 2—Factor loadings for original variables with rotated factors by diabetes status and sex at baseline

|                       | Men         |          |          |          |          |          |          |          | Women       |          |          |          |          |          |          |          |
|-----------------------|-------------|----------|----------|----------|----------|----------|----------|----------|-------------|----------|----------|----------|----------|----------|----------|----------|
|                       | Nondiabetic |          |          |          | Diabetic |          |          |          | Nondiabetic |          |          |          | Diabetic |          |          |          |
|                       | Factor 1    | Factor 2 | Factor 3 | Factor 4 | Factor 1 | Factor 2 | Factor 3 | Factor 4 | Factor 1    | Factor 2 | Factor 3 | Factor 4 | Factor 1 | Factor 2 | Factor 3 | Factor 4 |
| BMI                   | 0.657       | 0.170    | 0.1000   | 0.007    | 0.121    | −0.101   | 0.637    | 0.242    | 0.702       | 0.112    | 0.096    | 0.143    | 0.160    | −0.156   | 0.602    | 0.214    |
| WHR                   | 0.662       | 0.227    | 0.029    | 0.011    | 0.032    | 0.087    | 0.778    | −0.052   | 0.761       | 0.073    | 0.000    | 0.033    | 0.016    | 0.064    | 0.755    | −0.002   |
| SBP                   | −0.003      | 0.811    | 0.243    | −0.152   | 0.855    | 0.032    | 0.180    | 0.049    | 0.248       | 0.778    | 0.185    | 0.261    | 0.856    | 0.013    | 0.102    | 0.057    |
| DBP                   | 0.224       | 0.768    | 0.128    | 0.011    | 0.853    | −0.012   | −0.020   | 0.071    | 0.182       | 0.735    | 0.207    | 0.298    | 0.858    | 0.08     | −0.042   | 0.047    |
| UAER*                 | 0.210       | 0.299    | −0.173   | 0.272    | 0.390    | 0.534    | 0.009    | 0.052    | −0.014      | 0.263    | −0.085   | −0.279   | 0.372    | 0.417    | 0.097    | −0.025   |
| Total cholesterol     | −0.180      | −0.030   | 0.146    | 0.771    | 0.200    | 0.305    | 0.185    | 0.411    | 0.026       | −0.032   | 0.105    | 0.757    | 0.241    | 0.331    | 0.162    | 0.482    |
| Triglycerides*        | 0.276       | 0.016    | 0.024    | 0.654    | −0.019   | 0.482    | 0.344    | −0.066   | 0.080       | 0.130    | −0.036   | 0.665    | 0.017    | 0.349    | 0.436    | −0.125   |
| Fasting insulin*      | 0.676       | 0.078    | −0.031   | 0.241    | 0.086    | 0.072    | 0.445    | 0.667    | 0.649       | 0.098    | 0.183    | −0.038   | 0.057    | 0.062    | 0.413    | 0.598    |
| 2-h postload insulin* | 0.256       | 0.186    | 0.630    | 0.378    | 0.008    | −0.048   | −0.144   | 0.856    | 0.278       | −0.060   | 0.738    | 0.028    | 0.013    | −0.021   | −0.141   | 0.812    |
| FPG                   | 0.563       | −0.184   | 0.419    | −0.203   | −0.108   | 0.613    | −0.164   | −0.137   | 0.062       | 0.287    | 0.434    | −0.228   | −0.085   | 0.731    | −0.095   | −0.109   |
| 2-h PG                | −0.006      | 0.130    | 0.885    | 0.045    | 0.022    | 0.727    | 0.029    | 0.215    | −0.003      | 0.119    | 0.773    | 0.197    | 0.052    | 0.780    | 0.012    | 0.184    |
| Variance              | 17.4%       | 15.2%    | 13.6%    | 12.4%    | 17.3%    | 15.8%    | 14.6%    | 13.3%    | 15.2%       | 14.6%    | 13.4%    | 12.4%    | 15.5%    | 14.3%    | 13.0%    | 12.3%    |

Loadings  $\geq 0.40$  in bold type; \*log-transformed values.

ables in men and for 56% in women. Factor loadings after varimax rotation showed that the first factor correlated with BMI, WHR, and fasting insulin levels, the second factor with SBP and DBP, the third factor with FPG, 2-h PG, and 2-h insulin, and the fourth factor with serum cholesterol and triglycerides. In men, FPG also loaded on the first factor. These four factors were interpreted as obesity/insulin resistance, blood pressure, glucose/2-h insulin, and lipid factor, respectively.

### Factor analyses in diabetic participants

Although most correlations were similar in nondiabetic and diabetic subjects, some differences were noted. UAER correlated with FPG and 2-h PG in diabetic but not in nondiabetic men and women. Serum cholesterol and triglycerides correlated strongly with 2-h PG in both diabetic men and women. No significant correlations were found between insulin and glucose in diabetic men and women (data not shown). There were also four factors determined with eigenvalues  $>1$  that accounted for 61% of the variance in the original variables in men and 55% in women. The factor patterns showed some differences in separate analysis among men and women compared with the nondiabetic group (Table 2 and Fig. 2). On the first factor, SBP and DBP had positive loadings. On the second factor, UAER, FPG, and 2-h PG had strong loadings both in men and women, whereas triglycerides loaded on this factor in men also (loading = 0.482). On the third factor, WHR, BMI, and fasting insulin had positive loadings in both men and women, whereas triglycerides also were linked to this factor in women. On the fourth factor, fasting and 2-h insulin and cholesterol had positive loadings in both sexes. These four factors were interpreted as blood pressure, glucose, obesity/insulin resistance, and insulin factor, respectively.

Table 3 shows the results of logistic regression models when factors obtained from factor analyses were analyzed as independent variables for predicting the development of diabetes during the 5-year follow-up. Among 272 men who were originally nondiabetic and who participated in the follow-up study, both obesity/insulin resistance and glucose/2-h insulin factors were significantly associated with future diabetes in univariate lo-



**A** Men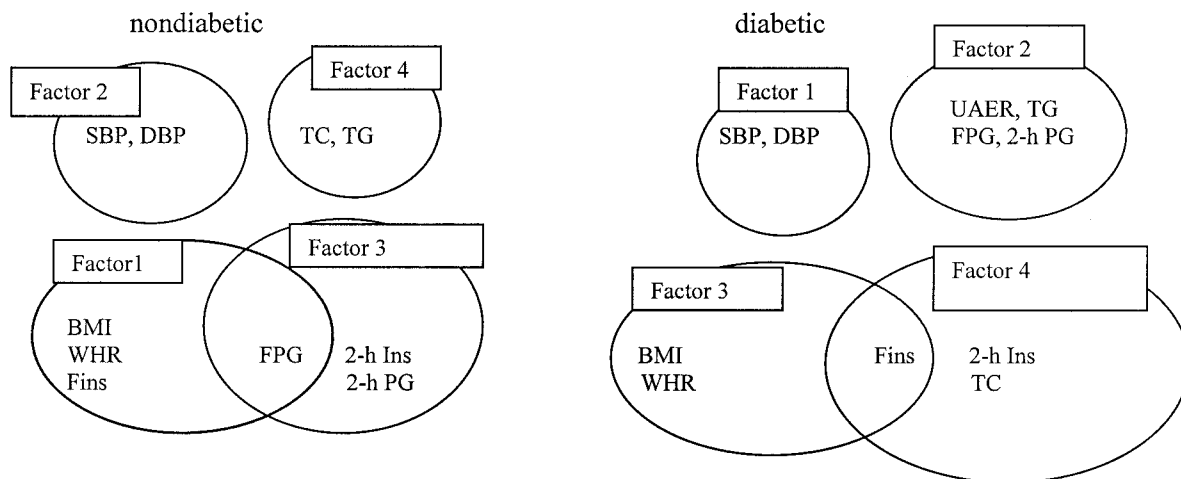**B** Women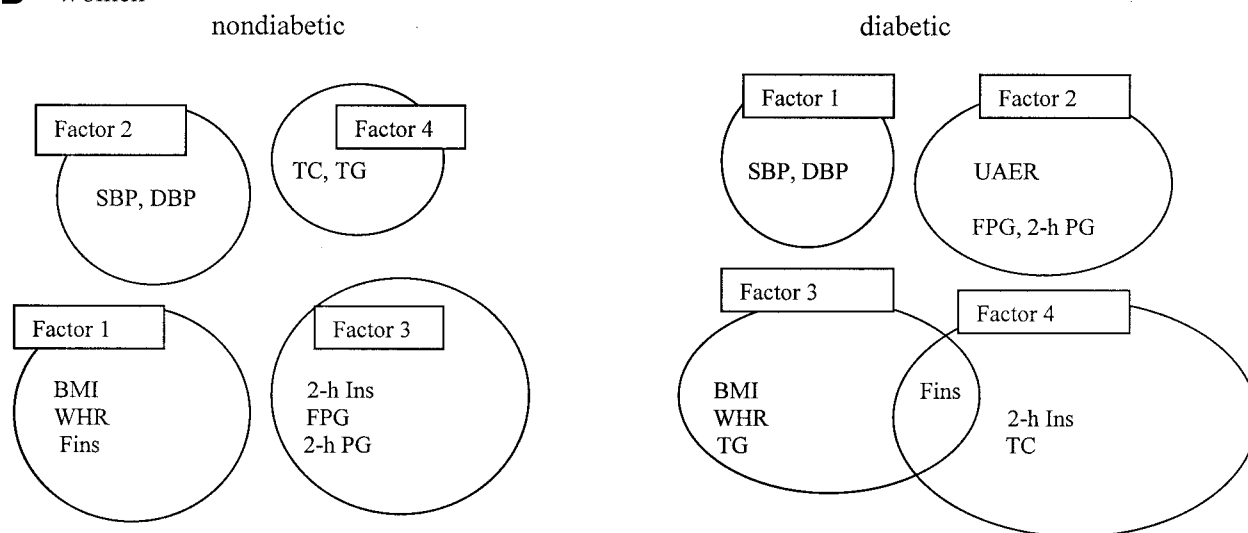

**Figure 2**—Clusters of the risk variables of the metabolic syndrome in men (A) and women (B) with and without diabetes. TC, total cholesterol; TG, triglycerides; Fins, fasting insulin; 2-h Ins, 2-h postload insulin.

gistic regression analysis with odds ratio (OR) 1.67 (95% CI 1.18–2.37) and 2.58 (1.74–3.81), respectively. Neither blood pressure factor nor lipid factor significantly predicted the development of diabetes (1.26 [0.91–1.74] and 1.17 [0.83–1.64], respectively). Multiple adjustments for age, smoking, family history of diabetes, education, and occupation did not significantly change the outcomes in these analyses. Among 287 women without diabetes at baseline, the OR in univariate model for obesity/insulin-resistance factor was 1.50 (1.08–2.07).

Blood pressure factor had a significant association with risk of developing diabetes in univariate logistic regression model (1.39 [1.03–1.88]), but this association was no longer significant after adjustment for age, smoking, family history of diabetes, education, and occupation. Glucose/2-h insulin factor in the univariate analysis was associated with the progression to diabetes (1.67 [1.20–2.31]). Similar to the male subjects, lipid factor was not significantly associated with the prediction of diabetes (1.13 [0.84–1.54]). No significant changes in ORs for other

factors were found in the adjusted model except the blood pressure factor.

**CONCLUSIONS**—To our knowledge, this is the first application of factor analysis to describe the clustering of the disorders characterizing the metabolic syndrome among nondiabetic and diabetic individuals in a Chinese population. This study is characterized by introducing a capillary glucose prescreening before the application of an OGTT at baseline. This selection procedure has two advantages. First, the yield of abnormal glucose

**Table 3—OR (95% CI) for factors by factor analyses to predict the development of diabetes during 5-year follow-up in 272 nondiabetic men and 287 nondiabetic women at baseline**

|                                   | Univariate |           |        | Adjusted* |           |        |
|-----------------------------------|------------|-----------|--------|-----------|-----------|--------|
|                                   | OR         | 95% CI    | P      | OR        | 95% CI    | P      |
| <b>Men (n = 272)</b>              |            |           |        |           |           |        |
| Obesity/insulin resistance        | 1.67       | 1.18–2.37 | 0.004  | 1.78      | 1.20–2.61 | 0.004  |
| Blood pressure                    | 1.26       | 0.91–1.74 | 0.17   | 1.36      | 0.90–2.05 | 0.144  |
| Glucose/2-h insulin               | 2.58       | 1.74–3.81 | <0.001 | 2.84      | 1.84–4.39 | <0.001 |
| Lipids                            | 1.17       | 0.83–1.64 | 0.365  | 1.10      | 0.77–1.57 | 0.589  |
| <b>Women (n = 287)</b>            |            |           |        |           |           |        |
| Obesity/insulin resistance factor | 1.50       | 1.08–2.07 | 0.016  | 1.51      | 1.05–2.18 | 0.026  |
| Blood pressure factor             | 1.39       | 1.03–1.88 | 0.029  | 1.31      | 0.90–1.89 | 0.157  |
| Glucose/2-h insulin factor        | 1.67       | 1.20–2.31 | 0.002  | 1.68      | 1.19–2.39 | 0.004  |
| Lipid factor                      | 1.13       | 0.84–1.54 | 0.403  | 1.17      | 0.84–1.65 | 0.339  |

\*Adjusted for age, smoking, family history of diabetes, education, and occupation.

tolerance at OGTT can be maximized in a large population survey. Second, the follow-up study may be more efficient because more high-risk cases can be included at baseline only at cost of missing a small number of individuals with diabetes or IGT (25). Therefore, the study sample in this study represents a population-based high-risk segment identified by raised postprandial glucose. In keeping with results from the Insulin Resistance Atherosclerosis Study (12), this study also showed that the subjects with NGT had similar factor patterns to those with IGR (data not shown).

Factor analysis can reveal underlying patterns or structures among variables showing high degrees of intercorrelation. If an analysis reveals only one underlying factor, this may be interpreted as supporting the unity hypothesis—that one unifying physiology (perhaps insulin resistance) underlies and accounts for the metabolic risk variable clustering. Finding more than one factor contradicts the unity hypothesis (13). Insulin resistance has been proposed as the underlying pathophysiological mechanism of the metabolic syndrome (7). Fasting insulin, used in our study, is a marker for insulin resistance in individuals with and without diabetes (6). The present factor analyses did not, however, identify a single factor only but identified a total of four factors that resulted in the clustering of the basic risk variables. These results suggest that insulin resistance alone does not underlie all features of the metabolic syndrome and that more than one pathophysiological mechanism are present for the full expression of the metabolic syndrome

among the Chinese population. Similar findings have been shown in a Korean population in whom obesity clustered with fasting insulin levels and the blood pressure factor was independent of other factors (18). Also in several populations, an independent blood pressure factor has been identified (12,14–16).

Although the factor patterns were consistent in the analyses among men and women separately, there was a remarkable contrast in the patterns between the subjects with and without diabetes. Among diabetic subjects, blood pressure was the most important factor and UAER was linked with glucose factor. As expected, the prevalence of microalbuminuria was higher in diabetic than nondiabetic subjects. Previous studies have shown that microalbuminuria in nondiabetic subjects was associated with atherosclerotic risk factors (29–31) and suggested that microalbuminuria might be a feature of the metabolic syndrome (1,32,33). Nevertheless, it is still controversial whether microalbuminuria is a marker for this syndrome or merely a complication of hypertension or diabetes (34). The majority of these studies have been performed in Caucasians (31,35), and only few data exist from Asian populations (29,36). One factor analysis study identified microalbuminuria as an independent factor among nondiabetic subjects (21), but another study did not (12). Our results imply that in the Chinese population, microalbuminuria is most likely to be a complication of hyperglycemia rather than a marker of the metabolic syndrome.

Regarding multifactorial diseases, it

has been the epidemiologist's convention to consider the independent weight of each risk factor in turn by multivariate analysis, thus also adjusting for bias introduced by confounding variables. Such an approach, however, fails to take into account the manner in which related factors may confer the risk in concert and obscures attempts to gain understanding about the factors (15). Because factor analysis reduces a large number of correlated variables to fewer uncorrelated factors, it can address some of these challenges. So far, there are only two studies relating the clustering of risk factors for the metabolic syndrome to incident diabetes using factor analysis (21,22). However, these studies did not analyze the data separately by sex, and the Pima Indian study did not include UAER among the variables. The present study showed that glucose/2-h insulin and obesity/insulin-resistance factor are strong risk factors for type 2 diabetes, whereas blood pressure factor and lipid factor were not associated with the development of diabetes. This implies that different physiological processes associated with various components of the metabolic syndrome contain unique information about the diabetes risk in the Chinese population.

In summary, factor analysis revealed consistent clusters of variables that were different in nondiabetic and diabetic subjects in the Chinese population. UAER was associated with glucose factor in diabetic subjects. Blood pressure was not linked with insulin resistance. Obesity and glucose/insulin factor were the strongest predictors of type 2 diabetes. These findings suggest that insulin resistance is not the single unifying factor for the clustering of the components of the metabolic syndrome. Different physiological processes associated with various components of the metabolic syndrome contain unique information about diabetes risk. Microalbuminuria is more likely to be a complication of the type 2 diabetes or hypertension than a marker of the metabolic syndrome.

**Acknowledgments**—This work was supported by a grant from the Bureau of Public Health of Beijing, the Preventive and Treatment Office of Beijing, and the Academy of Finland (46558, 77618, 204274, and 205657).

## References

- World Health Organization: *Definition, Diagnosis and Classification of Diabetes Mellitus and Its Complications: Report of a WHO Consultation. Part 1: Diagnosis and Classification of Diabetes Mellitus*. Geneva, World Health Org., 1999 (publ. no. WHO/NCD/NCS/99.2). Available from [http://whqlib.doc.who.int/hq/1999/who\\_ncd\\_ncs\\_99\\_2.pdf](http://whqlib.doc.who.int/hq/1999/who_ncd_ncs_99_2.pdf)
- Hodge AM, Dowse GK, Zimmet PZ: Microalbuminuria, cardiovascular risk factors, and insulin resistance in two populations with a high risk of type 2 diabetes mellitus. *Diabet Med* 13:441–449, 1996
- Zavaroni I, Bonini L, Gasparini P, Zuccarelli A, Dall'Aglio E, Barilli L, Cioni F, Strata A, Reaven GM: Dissociation between urinary albumin excretion and variables associated with insulin resistance in a healthy population. *J Intern Med* 240:151–156, 1996
- Mykkanen L, Zaccaro DJ, Wagenknecht LE, Robbins DC, Gabriel M, Haffner SM: Microalbuminuria is associated with insulin resistance in nondiabetic subjects: the Insulin Resistance Atherosclerosis Study. *Diabetes* 47:793–800, 1998
- Balkau B, Charles MA: Comment on the provisional report from the WHO consultation: European Group for the Study of Insulin Resistance (EGIR). *Diabet Med* 16:442–443, 1999
- Laakso M: How good a marker is insulin level for insulin resistance? *Am J Epidemiol* 137:959–965, 1993
- Reaven GM: Banting Lecture 1988: role of insulin resistance in human disease. *Diabetes* 37:1595–1607, 1988
- DeFronzo RA, Ferrannini E: Insulin resistance: a multifaceted syndrome responsible for NIDDM, obesity, hypertension, dyslipidemia, and atherosclerotic cardiovascular disease. *Diabetes Care* 14:173–194, 1991
- Freeman MS, Mansfield MW, Barrett JH, Grant PJ: Heritability of features of the insulin resistance syndrome in a community-based study of healthy families. *Diabet Med* 19:994–999, 2002
- Parker L, Lamont DW, Unwin N, Pearce MS, Bennett SM, Dickinson HO, White M, Mathers JC, Alberti KG, Craft AW: A lifecourse study of risk for hyperinsulinaemia, dyslipidaemia, and obesity (the central metabolic syndrome) at age 49–51 years. *Diabet Med* 20:406–415, 2003
- Stern MP: Diabetes and cardiovascular disease: the “common soil” hypothesis. *Diabetes* 44:369–374, 1995
- Hanley AJ, Karter AJ, Festa A, D'Agostino R Jr, Wagenknecht LE, Savage P, Tracy RP, Saad MF, Haffner S: Factor analysis of metabolic syndrome using directly measured insulin sensitivity: the Insulin Resistance Atherosclerosis Study. *Diabetes* 51:2642–2647, 2002
- Meigs JB: Invited commentary: insulin resistance syndrome, syndrome X, multiple metabolic syndrome, a syndrome at all, factor analysis reveals patterns in the fabric of correlated metabolic risk factors. *Am J Epidemiol* 152:908–911, 2000
- Meigs JB, D'Agostino RB Sr, Wilson PW, Cupples LA, Nathan DM, Singer DE: Risk variable clustering in the insulin resistance syndrome: the Framingham Offspring Study. *Diabetes* 46:1594–1600, 1997
- Gray RS, Fabsitz RR, Cowan LD, Lee ET, Howard BV, Savage PJ: Risk factor clustering in the insulin resistance syndrome: the Strong Heart Study. *Am J Epidemiol* 148:869–878, 1998
- Edwards KL, Burchfiel CM, Sharp DS, Curb JD, Rodriguez BL, Fujimoto WY, LaCroix AZ, Vitiello MV, Austin MA: Factors of the insulin resistance syndrome in nondiabetic and diabetic elderly Japanese-American men. *Am J Epidemiol* 147:441–447, 1998
- Snehalatha C, Sivasankari S, Satyavani K, Vijay V, Ramachandran A: Insulin resistance alone does not explain the clustering of cardiovascular risk factors in southern India. *Diabet Med* 17:152–157, 2000
- Choi KM, Lee J, Kim KB, Kim DR, Kim SK, Shin DH, Kim NH, Park IB, Choi DS, Baik SH: Factor analysis of the metabolic syndrome among elderly Koreans: the Southwest Seoul Study. *Diabet Med* 20:99–104, 2003
- Lempiainen P, Mykkanen L, Pyorala K, Laakso M, Kuusisto J: Insulin resistance syndrome predicts coronary heart disease events in elderly nondiabetic men. *Circulation* 100:123–128, 1999
- Lakka HM, Laaksonen DE, Lakka TA, Niskanen LK, Kumpusalo E, Tuomilehto J, Salonen JT: The metabolic syndrome and total and cardiovascular disease mortality in middle-aged men. *JAMA* 288:2709–2716, 2002
- Kekalainen P, Sarlund H, Pyorala K, Laakso M: Hyperinsulinemia cluster predicts the development of type 2 diabetes independently of family history of diabetes. *Diabetes Care* 22:86–92, 1999
- Hanson RL, Imperatore G, Bennett PH, Knowler WC: Components of the “metabolic syndrome” and incidence of type 2 diabetes. *Diabetes* 51:3120–3127, 2002
- National Diabetes Research Group: Diabetes mellitus survey of 300,000 in fourteen provinces and cities of China. *Chin Med J* 20:678–683, 1981
- Pan XR, Yang WY, Li GW, Liu J: Prevalence of diabetes and its risk factors in China, 1994: National Diabetes Prevention and Control Cooperative Group. *Diabetes Care* 20:1664–1669, 1997
- Pan XR, Hu YH, Li GW, Liu PA, Bennett PH, Howard B: Impaired glucose tolerance and its relationship to ECG-indicated coronary heart disease and risk factors among Chinese: Da Qing IGT and Diabetes Study. *Diabetes Care* 16:150–156, 1993
- Yuan SY, Zhu LX, Hu HY, Pan SF, Yuan MX, Guo FX, Zhen QL, Zhan HW, Lu ZX, Fu HJ, Li SQ, Chen JW, Liu YT, Zhang F, Wang FR, Zhang MX, Chu PZ, Fen JP: A screening survey of diabetes mellitus in a population of 20682 and of OGTT in a population of 1566 in Beijing district. *Chin J Endocrinol Metab* 13:69–72, 1997
- Wang JJ, Yuan SY, Zhu LX, Fu HJ, Li HB, Hu G, Tuomilehto J: Effects of impaired fasting glucose and impaired glucose tolerance on predicting incident type 2 diabetes in a Chinese population with high post-prandial glucose. *Diabetes Res Clin Pract.* In press
- Sakkinen PA, Wahl P, Cushman M, Lewis MR, Tracy RP: Clustering of procoagulation, inflammation, and fibrinolysis variables with metabolic factors in insulin resistance syndrome. *Am J Epidemiol* 152:897–907, 2000
- Woo J, Cockram CS, Swaminathan R, Lau E, Chan A, Cheung R: Microalbuminuria and other cardiovascular risk factors in nondiabetic subjects. *Int J Cardiol* 37:345–350, 1992
- Agewall S, Persson B, Samuelsson O, Ljungman S, Herlitz H, Fagerberg B: Microalbuminuria in treated hypertensive men at high risk of coronary disease: the Risk Factor Intervention Study Group. *J Hypertens* 11:461–469, 1993
- Jensen JS, Borch-Johnsen K, Jensen G, Feldt-Rasmussen B: Atherosclerotic risk factors are increased in clinically healthy subjects with microalbuminuria. *Atherosclerosis* 112:245–252, 1995
- Nosadini R, Cipollina MR, Solini A, Sambataro M, Morocutti A, Doria A, Fioretto P, Brocco E, Muollo B, Frigato F: Close relationship between microalbuminuria and insulin resistance in essential hypertension and non-insulin dependent diabetes mellitus. *J Am Soc Nephrol* 3:S56–S63, 1992
- Groop L, Ekstrand A, Forsblom C, Widen E, Groop PH, Teppo AM, Eriksson J: Insulin resistance, hypertension and microalbuminuria in patients with type 2 (non-insulin-dependent) diabetes mellitus. *Diabetologia* 36:642–647, 1993
- Jager A, Kostense PJ, Nijpels G, Heine RJ, Bouter LM, Stehouwer CD: Microalbuminuria is strongly associated with NIDDM and hypertension, but not with the insulin resistance syndrome: the Hoorn Study. *Diabetologia* 41:694–700, 1998



35. Winocour PH, Harland JO, Millar JP, Laker MF, Alberti KG: Microalbuminuria and associated cardiovascular risk factors in the community. *Atherosclerosis* 93:71–81, 1992
36. Kim YI, Kim CH, Choi CS, Chung YE, Lee MS, Lee SI, Park JY, Hong SK, Lee KU: Microalbuminuria is associated with the insulin resistance syndrome independent of hypertension and type 2 diabetes in the Korean population. *Diabetes Res Clin Pract* 52:145–152, 2001
